# Supplementary material for: Biosynthetic Melanin/Ce6-Based Photothermal and Sonodynamic Therapies Significantly Improved the Anti-Tumor Efficacy
Source: MDPI journal article supplement (doi:10.3390/pharmaceutics15082058), 2023-07-31
Supplement: s1 [file s1]

Supplementary Materials:

# Biosynthetic melanin/Ce6-based photothermal and sonodynamic therapies significantly improved the anti-tumor efficacy

Yuping Yang <sup>1,2,3</sup>, Yaling He <sup>4</sup>, Meijun Fu <sup>4</sup>, Meijun Zhou <sup>2</sup>, Xinxin Li <sup>4</sup>, Hongmei Liu <sup>1,2,\*</sup> and Fei Yan <sup>4,\*</sup>

ATGGGCAGCAGCCATCACCATCATCACCACAGCCAGGATCCGGCGCGCCATGGG-  
TAACAAGTATAGAGTTAGAAAAACGTATTACATCTTACCGACACGGAAAAAGAGATTTT-  
GTTCGTACCGTGCTAATACTAAAGGAAAAAGGGATATATGACCGCTATATAGCCTGG-  
CATGGTGCAGCAGGTAAATTTCACTCTCCGGGCAGCGATCGAAATGCAGCACATATGAG-  
TTCTGCTTTTTTACCGTGGCATCGTGAATACCTTTTACGATTCTGAACGTGACCTTCAG-  
TCAATCAATCCAGAAGTAACCTTCCTTATTGGGAATGGGAAACGGACGCACAGATGCAG-  
GATCCCTCACAAATCACAATTTGGAGTGCAGATTTTATGGGAGGAAACGGAAATCCCATAAAA-  
GATTTTATCGTCGATACCGGGCCATTTGCAGCTGGGCGCTGGACGAC-  
GATCGATGAACAAGGAAATCCTTCCGGAGGGCTAAAACGTAATTTTGGAGCAACGAAA-  
GAGGCACCTACACTCCCTACTCGAGATGATGTCCTCAATGCTTTAAAAATAACTCAGTATGA-  
TACGCCGCTTGGGATATGACCAGCCAAAACAGCTTTTCGTAATCAGCTTGAAGGAT-  
TTATTAACGGGCCACAGCTTCACAATCGCGTACACCGTTGGGTTGGCGGACAGATGGGCGTT-  
GTGCCTACTGCTCCGAATGATCCTGTCTTCTTTTTACACCACGCAAATGTGGATCGTATTT-  
GGGCTGTATGGCAAATTATTCATCGTAATCAAACTATCAGCCGATGAAAAACGGGCCATTT-  
GGTCAAACTTTAGAGATCCGATGTACCTTGAATACAACCCCTGAAGACGTTATGAAC-  
CATCGAAAGCTTGGGTACGTATACGATATAGAATTAAGAAAATCAAAACGTTCTCATAA

**Figure S1.** The open reading frame sequence of tyrosinase gene from *B. megaterium*.

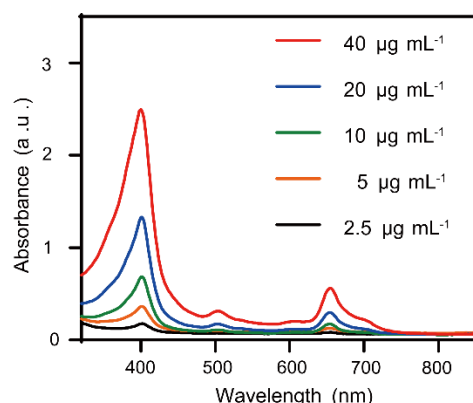

**Figure S2.** The photo absorbance spectra of Ce6 at varied concentrations.

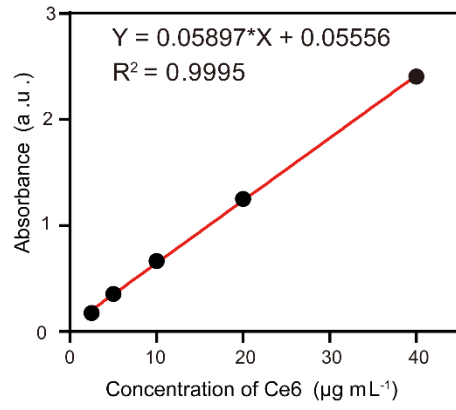

**Figure S3.** The concentration-dependent absorbance of Ce6 at the wavelength 404 nm.

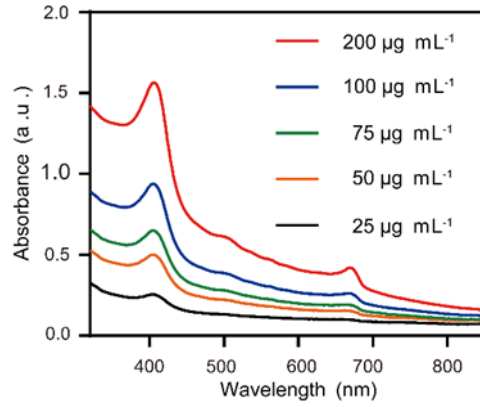

**Figure S4.** The photo absorbance spectra of MC@Lip at different concentrations.

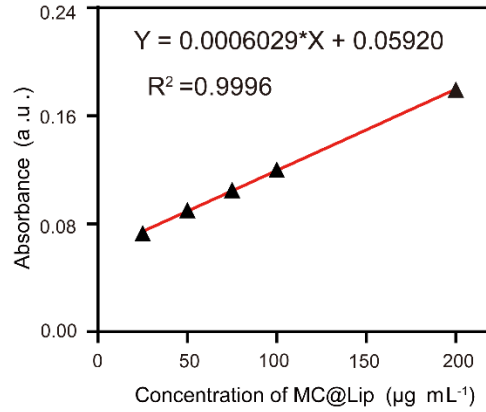

**Figure S5.** The concentration-dependent absorbance of MC@Lip at the wavelength 808 nm.

And the  $\eta$  value which is the photothermal conversion efficiency was calculated as follows:

$$\eta_T = \frac{hA(\Delta T_{\max} - \Delta T_{\max, H_2O})}{I(1 - 10^{-A_{808}})} \quad \tau_s = \frac{m_{H_2O} c_{H_2O}}{hA}$$

$\Delta T_{\max}$  and  $\Delta T_{\max, H_2O}$  stand for the temperature elevation of MC@Lip and de-ionized water under the irradiation of 808 nm laser for 5 min. The  $I$  is the laser power, and  $A_{808}$  is the absorbance of MC@Lip. The  $h$  and  $A$  represent the heat transfer coefficient and surface area of container.  $m_{H_2O}$  and  $c_{H_2O}$  are the mass (0.2 g) the heat capacity (4.2 J g<sup>-1</sup>) of deionized water.

| $\Delta T$ | $A_{808}$ | $I$ (W) | $\tau_s$ | $h_A$   | $\eta$  |
|------------|-----------|---------|----------|---------|---------|
| 20.0       | 0.1795    | 1.00    | 116.8    | 0.00719 | 42.47 % |

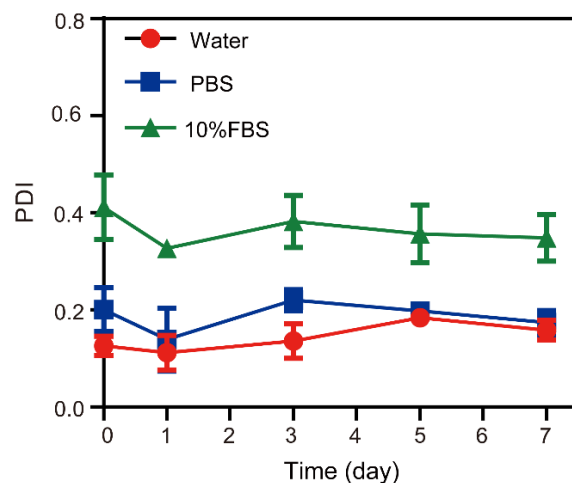

**Figure S6.** Changes in the polydispersity indexes of MC@Lip stored in water, PBS or 10% FBS at 4°C for different durations.

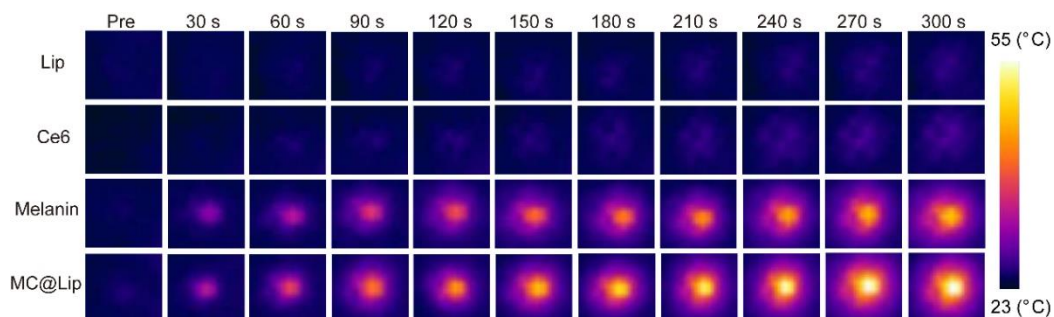

**Figure S7.** IR thermal images of MC@Lip (melanin concentration: 200  $\mu\text{g mL}^{-1}$ ), Lip, melanin (200  $\mu\text{g mL}^{-1}$ ) and Ce6 (12  $\mu\text{g mL}^{-1}$ ) suspension under 5 min NIR irradiation (808nm, 1.00 W  $\text{cm}^{-2}$ ).

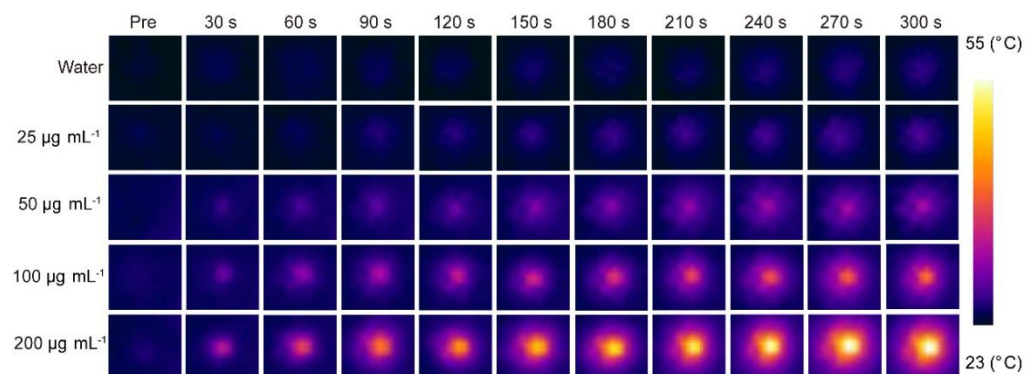

**Figure S8.** IR thermal images of pure water and MC@Lip suspension at different concentrations (25, 50, 100 and 200  $\mu\text{g mL}^{-1}$ ) under 5 min NIR irradiation (808nm, 1.00 W  $\text{cm}^{-2}$ ).

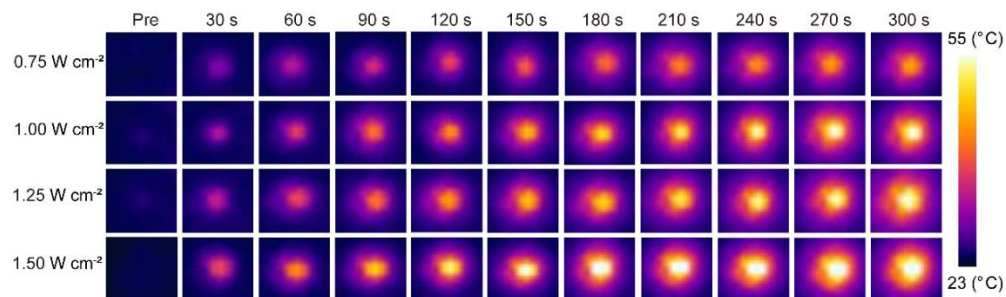

**Figure S9.** IR thermal images of MC@Lip (melanin concentration:  $200 \mu\text{g mL}^{-1}$ ) suspension under different power densities of 5 min NIR irradiation (808 nm, 0.75, 1.00, 1.25 and  $1.50 \text{ W cm}^{-2}$ ).

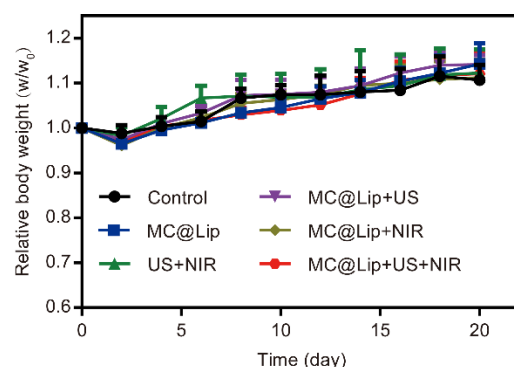

**Figure S10.** Mice weight curves ( $n = 5$ ) of six groups after various treatments.

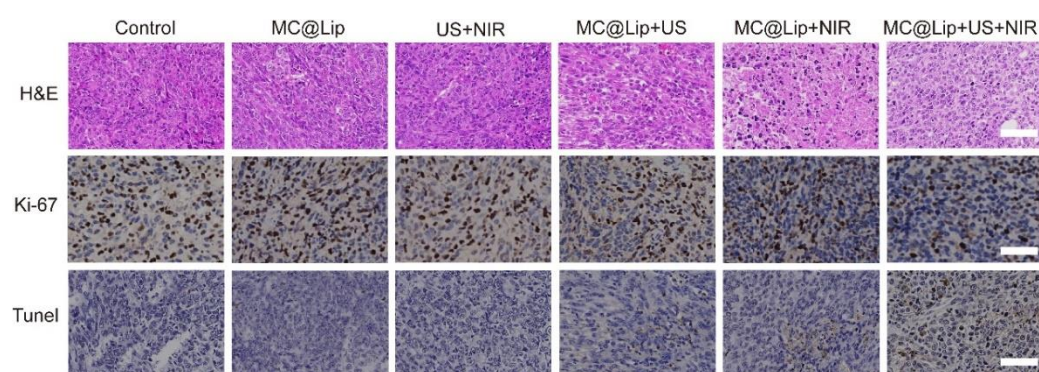

**Figure S11.** H&E staining, immunochemical staining of Ki-67 and TUNEL staining in tumor region of six groups after different treatments. Scale bar =  $50 \mu\text{m}$ .

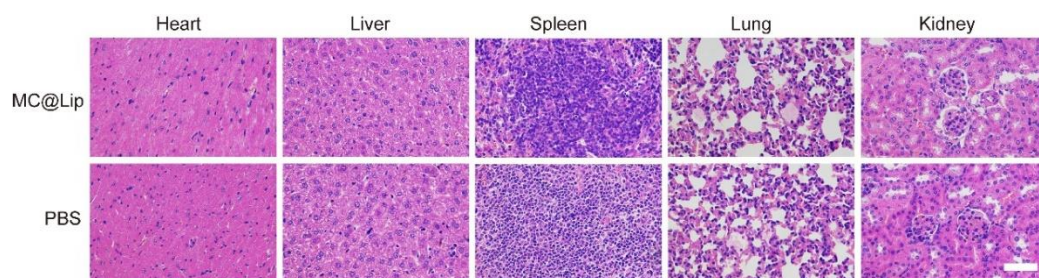

**Figure S12.** H&E-stained organ slices of healthy mice injected with MC@Lip dispersion or PBS solution after 14 days. Scale bar =  $50 \mu\text{m}$ .

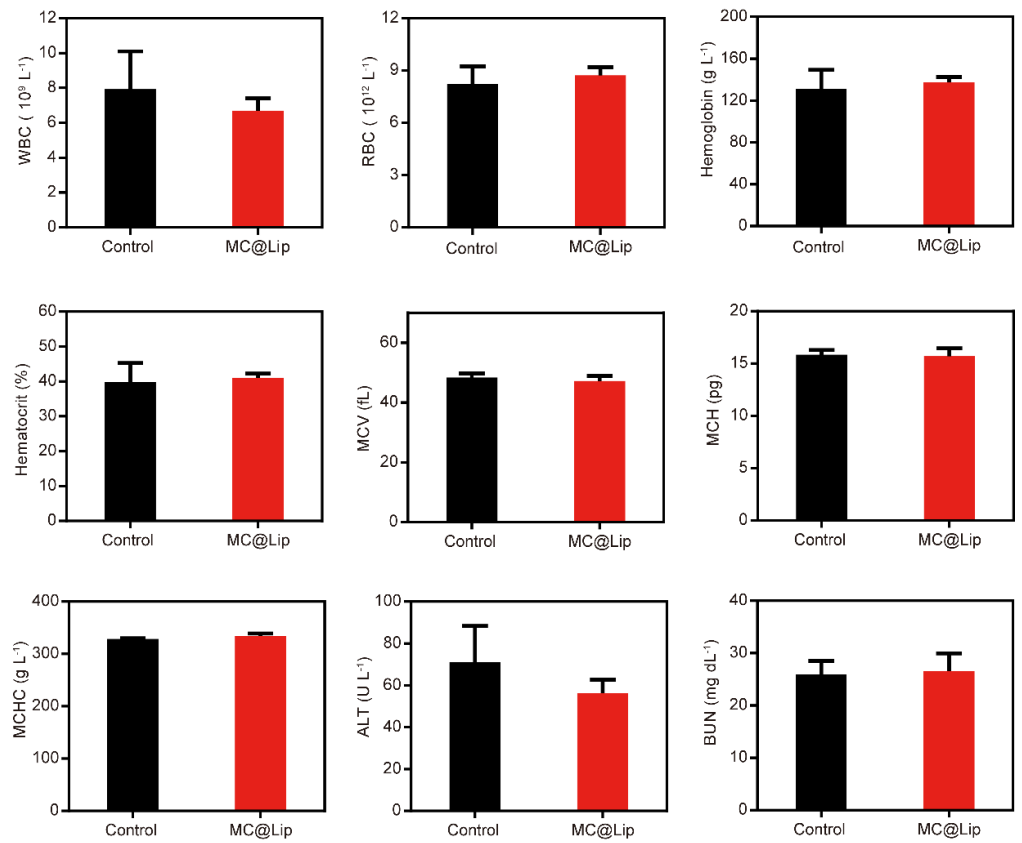

**Figure S13.** Blood biochemistry and hematology data of healthy mice injected with MC@Lip dispersion or PBS solution after 14 days.
